# Supplementary material for: Impact of SORL1 genetic variations on MRI markers in non-demented elders
Source: PubMed Central journal article supplement (PMC5077969; doi:10.18632/oncotarget.9300), 2016-05-11
Supplement: oncotarget-07-31689-s001.pdf [file oncotarget-07-31689-s001.pdf]

## Impact of SORL1 genetic variations on MRI markers in non-demented elders

### Supplementary Material

Supplementary Table 1. Associations of SORL1 loci with brain regions on MRI in hybrid population

| ROI                         | SNPs       | Baseline |                |               |          | Follow-up (2 year) |        |                |                  |          |                 |
|-----------------------------|------------|----------|----------------|---------------|----------|--------------------|--------|----------------|------------------|----------|-----------------|
|                             |            | Sample   | P-value        |               | Pc-value |                    | Sample | P-value        |                  | Pc-value |                 |
|                             |            |          | Left           | Right         | Left     | Right              |        | Left           | Right            | Left     | Right           |
| Hippocampus<br>(Volume)     | rs11218350 | 536      | 0.9297         | 0.8273        | 0.9297   | 0.8745             | 238    | <b>0.0345</b>  | 0.2286           | 0.276    | 0.8715          |
|                             | rs12364988 | 536      | 0.5795         | 0.5486        | 0.7727   | 0.7314             | 238    | 0.4182         | 0.944            | 0.6152   | 0.9972          |
|                             | rs1784933  | 536      | 0.1459         | 0.0645        | 0.389    | 0.3432             | 238    | 0.4614         | 0.6451           | 0.6152   | 0.91            |
|                             | rs2298813  | 535      | 0.09339        | 0.1116        | 0.3736   | 0.3432             | 238    | 0.6222         | 0.9972           | 0.6648   | 0.9972          |
|                             | rs3781836  | 536      | <b>0.04342</b> | 0.3243        | 0.3474   | 0.6486             | 238    | 0.2495         | 0.6825           | 0.5427   | 0.91            |
|                             | rs3824968  | 535      | 0.3758         | 0.4779        | 0.7385   | 0.7314             | 238    | 0.08163        | <b>0.03061</b>   | 0.3265   | 0.2449          |
|                             | rs4935774  | 533      | 0.4615         | 0.1287        | 0.7385   | 0.3432             | 237    | 0.6648         | 0.6174           | 0.6648   | 0.91            |
|                             | rs753780   | 535      | 0.834          | 0.8745        | 0.9297   | 0.8745             | 237    | 0.2713         | 0.3268           | 0.5427   | 0.8715          |
| Parahippocampal<br>(Volume) | rs11218350 | 536      | 0.7074         | 0.7594        | 0.7074   | 0.9124             | 237    | 0.6826         | 0.5945           | 0.9101   | 0.988           |
|                             | rs12364988 | 536      | 0.4111         | 0.9124        | 0.7074   | 0.9124             | 237    | 0.992          | 0.8649           | 0.992    | 0.988           |
|                             | rs1784933  | 536      | 0.5331         | 0.7902        | 0.7074   | 0.9124             | 237    | <b>0.04121</b> | <b>0.0007371</b> | 0.2452   | <b>0.005897</b> |
|                             | rs2298813  | 535      | 0.1495         | <b>0.0226</b> | 0.5978   | 0.1808             | 237    | 0.06131        | 0.988            | 0.2452   | 0.988           |
|                             | rs3781836  | 536      | 0.7026         | 0.9035        | 0.7074   | 0.9124             | 237    | 0.8632         | 0.1126           | 0.9865   | 0.3003          |
|                             | rs3824968  | 535      | 0.5572         | 0.1738        | 0.7074   | 0.6613             | 237    | 0.3973         | 0.7274           | 0.6357   | 0.988           |
|                             | rs4935774  | 533      | 0.1171         | 0.248         | 0.5978   | 0.6613             | 236    | 0.2501         | 0.9582           | 0.5286   | 0.988           |
|                             | rs753780   | 535      | 0.531          | 0.6854        | 0.7074   | 0.9124             | 236    | 0.2643         | <b>0.005774</b>  | 0.5286   | <b>0.0231</b>   |

|                                              |            |     |         |         |        |        |     |         |                |        |        |
|----------------------------------------------|------------|-----|---------|---------|--------|--------|-----|---------|----------------|--------|--------|
| <b>Middle Temporal<br/>(volume)</b>          | rs11218350 | 536 | 0.8074  | 0.8672  | 0.9873 | 0.8672 | 238 | 0.5601  | 0.6308         | 0.8647 | 0.721  |
|                                              | rs12364988 | 536 | 0.8376  | 0.2367  | 0.9873 | 0.3788 | 238 | 0.2949  | 0.4501         | 0.6535 | 0.6849 |
|                                              | rs1784933  | 536 | 0.6059  | 0.3519  | 0.9873 | 0.4022 | 238 | 0.6485  | 0.5136         | 0.8647 | 0.6849 |
|                                              | rs2298813  | 535 | 0.08943 | 0.1668  | 0.7154 | 0.3788 | 238 | 0.3229  | 0.1221         | 0.6535 | 0.3751 |
|                                              | rs3781836  | 536 | 0.2887  | 0.07894 | 0.9873 | 0.3788 | 238 | 0.7624  | 0.2525         | 0.8713 | 0.505  |
|                                              | rs3824968  | 535 | 0.7054  | 0.2021  | 0.9873 | 0.3788 | 238 | 0.3267  | 0.8278         | 0.6535 | 0.8278 |
|                                              | rs4935774  | 533 | 0.9873  | 0.3209  | 0.9873 | 0.4022 | 237 | 0.9925  | 0.1407         | 0.9925 | 0.3751 |
|                                              | rs753780   | 535 | 0.958   | 0.1191  | 0.9873 | 0.3788 | 237 | 0.2577  | <b>0.04399</b> | 0.6535 | 0.3519 |
| <b>Posterior<br/>Cingulate<br/>(volume)</b>  | rs11218350 | 536 | 0.2716  | 0.1914  | 0.7241 | 0.7655 | 238 | 0.7451  | 0.811          | 0.9018 | 0.811  |
|                                              | rs12364988 | 536 | 0.5286  | 0.6628  | 0.8012 | 0.8165 | 238 | 0.6134  | 0.6276         | 0.9018 | 0.7436 |
|                                              | rs1784933  | 536 | 0.0533  | 0.7318  | 0.4264 | 0.8165 | 238 | 0.1488  | 0.5385         | 0.9018 | 0.7436 |
|                                              | rs2298813  | 535 | 0.7749  | 0.7538  | 0.8012 | 0.8165 | 238 | 0.5622  | 0.09505        | 0.9018 | 0.4392 |
|                                              | rs3781836  | 536 | 0.2431  | 0.1803  | 0.7241 | 0.7655 | 238 | 0.8149  | 0.5787         | 0.9018 | 0.7436 |
|                                              | rs3824968  | 535 | 0.6837  | 0.4345  | 0.8012 | 0.8165 | 238 | 0.7287  | 0.488          | 0.9018 | 0.7436 |
|                                              | rs4935774  | 533 | 0.4174  | 0.4061  | 0.8012 | 0.8165 | 237 | 0.9018  | 0.6506         | 0.9018 | 0.7436 |
|                                              | rs753780   | 535 | 0.8012  | 0.8165  | 0.8012 | 0.8165 | 237 | 0.2621  | 0.1098         | 0.9018 | 0.4392 |
| <b>Entorhinal<br/>Cortex<br/>(Thickness)</b> | rs11218350 | 536 | 0.3751  | 0.6644  | 0.695  | 0.7593 | 238 | 0.5119  | 0.5496         | 0.6189 | 0.6403 |
|                                              | rs12364988 | 536 | 0.4764  | 0.5451  | 0.695  | 0.7268 | 238 | 0.4449  | 0.4002         | 0.6189 | 0.6403 |
|                                              | rs1784933  | 536 | 0.5212  | 0.5362  | 0.695  | 0.7268 | 238 | 0.9186  | 0.5983         | 0.9186 | 0.6403 |
|                                              | rs2298813  | 535 | 0.4793  | 0.2264  | 0.695  | 0.6038 | 238 | 0.09837 | 0.5322         | 0.6189 | 0.6403 |
|                                              | rs3781836  | 536 | 0.7825  | 0.0837  | 0.8943 | 0.556  | 238 | 0.4114  | 0.6403         | 0.6189 | 0.6403 |
|                                              | rs3824968  | 535 | 0.9775  | 0.8877  | 0.9775 | 0.8877 | 238 | 0.2386  | 0.1164         | 0.6189 | 0.4655 |
|                                              | rs4935774  | 533 | 0.4631  | 0.3264  | 0.695  | 0.6528 | 237 | 0.1795  | 0.6142         | 0.6189 | 0.6403 |
|                                              | rs753780   | 535 | 0.252   | 0.139   | 0.695  | 0.556  | 237 | 0.5416  | 0.06064        | 0.6189 | 0.4655 |

**Supplementary Table 2. Significant results from multiple linear regression analysis for each genotype**

| Neuroimaging phenotypes | ROI                   | SNPs      | Sample | Means±SD of variables    |                     |                          | P-value   | Pc-value |
|-------------------------|-----------------------|-----------|--------|--------------------------|---------------------|--------------------------|-----------|----------|
|                         |                       |           |        | Minor allele homozygotes | Heterozygous        | Major allele homozygotes |           |          |
| Volume                  | Right Parahippocampal | rs1784933 | 238    | G/G(NA±NA)               | G/A(0.9252±0.07056) | A/A(0.9806±0.08028)      | 0.0007371 | 0.005897 |
|                         | Right Parahippocampal | rs753780  | 237    | T/T(0.9256±0.02371)      | T/C(0.9391±0.0827)  | C/C(0.9805±0.07995)      | 0.005774  | 0.0231   |

**Supplementary table 3 The replicated results of the associations of *SORL1* loci with parahippocampal gyrus volume in subgroup population**

| Phenotypes                          | SNP       | Subgroup | Sample | P-value       |                 |
|-------------------------------------|-----------|----------|--------|---------------|-----------------|
|                                     |           |          |        | Left          | Right           |
| The volume of parahippocampal gyrus | rs1784933 | MCI      | 168    | <b>0.0255</b> | <b>0.001344</b> |
|                                     |           | NC       | 60     | 0.5952        | <b>0.04194</b>  |
|                                     | rs753780  | MCI      | 168    | 0.2419        | <b>0.02209</b>  |
|                                     |           | NC       | 59     | 0.9442        | 0.05093         |
